# Supplementary material
Source: PubMed Central journal article supplement (PMC2245837)

Supplemental Figure 3

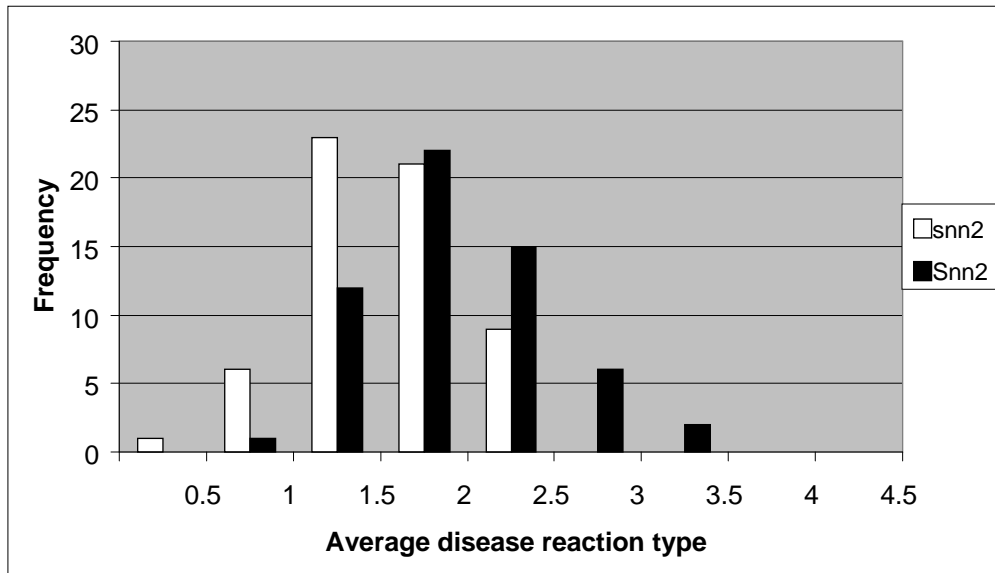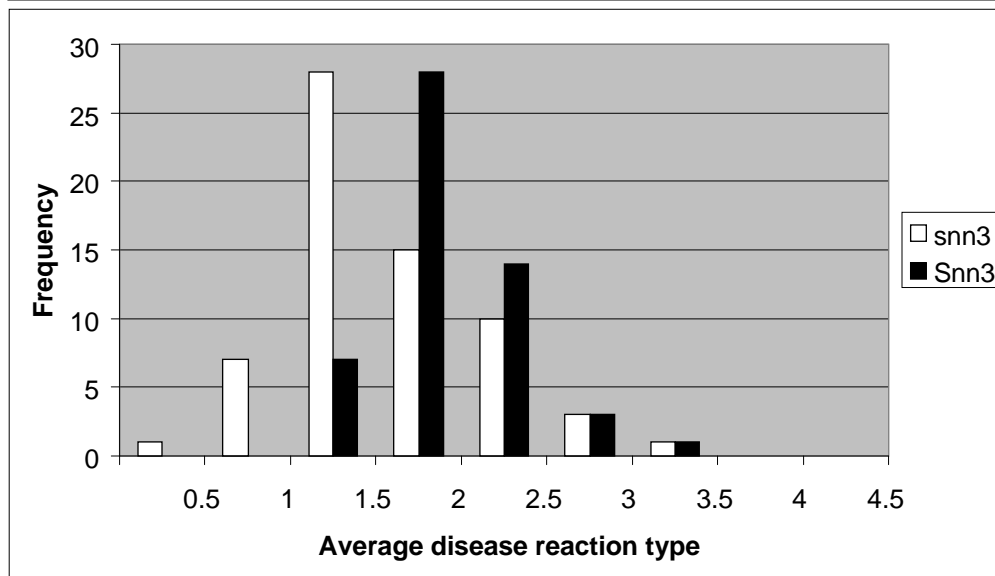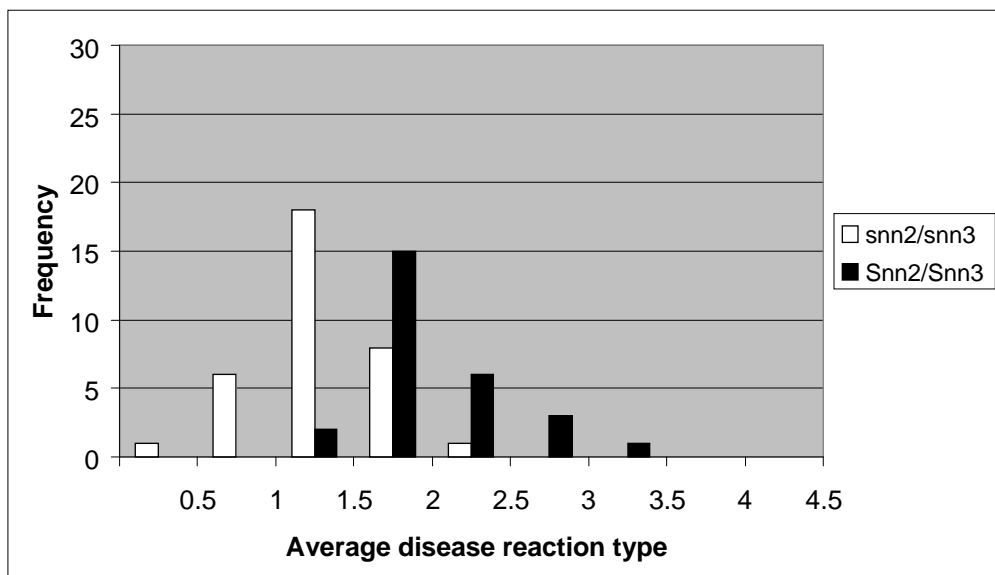

Supplement: plntphys_pp.107.108761_3.pdf [file plntphys_pp.107.108761_3.pdf]
